# Supplementary material
Source: bioRxiv or medRxiv preprint supplement (https://www.biorxiv.org/highwire/filestream/123270/field_highwire_adjunct_files/0/236075-1.pdf)
Supplement: Supplementary file [file 236075-1.pdf]

## Supplementary information: Robust, real-time and autonomous monitoring of ecosystems with an open, low-cost, networked device

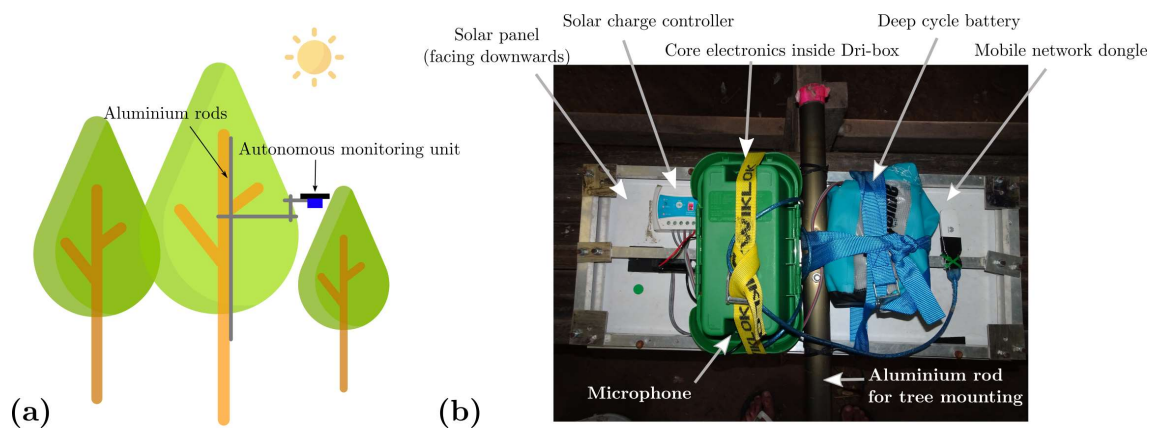

Figure S1: **Canopy mounting of the autonomous monitoring unit.** Here we display how the autonomous acoustic monitoring units were mounted in the canopy at SAFE Project. **(a)** A series of aluminium rods were affixed to the tree to allow the solar panel to reach direct sunlight out of the shade of the canopy. **(b)** A close-up view of the inverted monitoring unit with all components attached.

Table S1: **Autonomous monitoring unit cost breakdown.** Parts list and typical costs for one autonomous ecosystem monitoring unit assembled in the UK, as of August 2017. In this case the system is configured for acoustic monitoring.

| <b>Item</b>                         | <b>Cost (GBP)</b>              |
|-------------------------------------|--------------------------------|
| <i><b>One-off costs</b></i>         |                                |
| Raspberry Pi A+                     | £21.59                         |
| SanDisk 64GB SD card                | £17.39                         |
| Huawei E3531 3G dongle              | £21.00                         |
| Dri-box weatherproof box            | £10.09                         |
| Anker powered USB hub               | £20.00                         |
| 12V to 5V DC step down converter    | £6.29                          |
| 12V 10Ah AGM deep-cycle battery     | £23.98                         |
| Solar charge controller             | £10.99                         |
| 30W solar panel                     | £45.08                         |
| <i><b>Audio sensor costs</b></i>    |                                |
| Ugreen USB audio card               | £6.99                          |
| Rode SmartLav + electret microphone | £44.00                         |
| <i><b>Operational costs</b></i>     |                                |
| 60GB data sim card                  | £30.00 per month               |
| <b>Total</b>                        | <b>£227.40 + £30 per month</b> |
